# Supplementary material for: Cumulative dose of epinephrine and mode of death after non-shockable out-of-hospital cardiac arrest: a registry-based study
Source: PubMed Central journal article supplement (PMC10734153; doi:10.1186/s13054-023-04776-0), 2023-12-20
Supplement: 13054_2023_4776_MOESM1_ESM.pdf [file 13054_2023_4776_MOESM1_ESM.pdf]

## Additional file 1

**Table S1**

Characteristics of study population according to epinephrine dose administered during CPR

| Variables<br>n (%) or mean $\pm$ SD | 0 mg<br>(n = 243) | 1 mg<br>(n = 445) | 2 – 5 mg<br>(n = 1586) | > 5 mg<br>(n = 518) | <i>p</i> -value<br>Chi2 or<br>ANOVA |
|-------------------------------------|-------------------|-------------------|------------------------|---------------------|-------------------------------------|
| Male                                | 138 (56.8%)       | 272 (61.1%)       | 958 (60.4%)            | 334 (64.5%)         | 0.20                                |
| Age (years)                         | 67.3 $\pm$ 17.3   | 64.3 $\pm$ 16.1   | 63.8 $\pm$ 14.8        | 59.8 $\pm$ 14.6     | < 0.001                             |
| Home location                       | 181 (74.5%)       | 316 (71.2%)       | 1159 (73.1%)           | 353 (68.3%)         | 0.15                                |
| Witnessed                           | 210 (86.4%)       | 366 (82.4%)       | 1297 (82.0%)           | 440 (84.9%)         | 0.20                                |
| Bystander CPR                       | 141 (58.8%)       | 233 (52.6%)       | 902 (57.6%)            | 335 (64.9%)         | 0.001                               |
| No-flow duration (min)              | 4.1 $\pm$ 5.0     | 7.1 $\pm$ 9.3     | 6.9 $\pm$ 8.4          | 5.2 $\pm$ 7.1       | < 0.001                             |
| First recorded rhythm               |                   |                   |                        |                     | < 0.001                             |
| Asystole                            | 193 (79.4%)       | 352 (79.1%)       | 1369 (86.3%)           | 447 (86.3%)         |                                     |
| PEA                                 | 50 (20.6%)        | 93 (20.9%)        | 217 (13.7%)            | 71 (13.7%)          |                                     |
| Low-flow duration (min)             | 15.5 $\pm$ 15.9   | 21.6 $\pm$ 13.5   | 27.6 $\pm$ 16.5        | 49.3 $\pm$ 30.9     | < 0.001                             |
| Heart disease                       | 76 (31.3%)        | 130 (29.2%)       | 464 (29.3%)            | 137 (26.5%)         | 0.51                                |
| Ischemic cardiopathy                | 39 (16.1%)        | 69 (15.5%)        | 243 (15.3%)            | 65 (12.6%)          | 0.41                                |
| Cancer                              | 37 (15.2%)        | 55 (12.4%)        | 192 (12.1%)            | 34 (6.6%)           | 0.001                               |
| Renal disease                       | 19 (7.8%)         | 38 (8.5%)         | 151 (9.5%)             | 33 (6.4%)           | 0.16                                |
| High blood pressure                 | 103 (42.4%)       | 174 (39.1%)       | 689 (43.4%)            | 213 (41.1%)         | 0.39                                |
| Diabetes mellitus                   | 32 (13.2%)        | 81 (18.2%)        | 392 (24.7%)            | 143 (27.6%)         | < 0.001                             |
| Dyslipidemia                        | 35 (14.4%)        | 72 (16.2%)        | 272 (17.2%)            | 94 (18.2%)          | 0.60                                |
| ECMO                                | 11 (4.5%)         | 10 (2.3%)         | 97 (6.1%)              | 112 (21.6%)         | < 0.001                             |
| Shock                               | 4 (36.4%)         | 4 (40.0%)         | 21 (21.7%)             | 7 (6.2%)            |                                     |
| ARDS                                | 0 (0.0%)          | 0 (0.0%)          | 1 (1.0%)               | 0 (0.0%)            |                                     |
| Refractory CA                       | 7 (63.6%)         | 6 (60.0%)         | 75 (77.3%)             | 105 (93.8%)         |                                     |
| Coronary angioplasty                | 20 (8.2%)         | 40 (9.0%)         | 142 (9.0%)             | 54 (10.4%)          | 0.72                                |
| TTM                                 | 77 (32.6%)        | 202 (46.1%)       | 645 (41.5%)            | 171 (33.7%)         | < 0.001                             |
| Post-resuscitation shock            | 118 (51.8%)       | 282 (66.7%)       | 1072 (70.9%)           | 370 (79.1%)         | < 0.001                             |
| Presumed cause of CA                |                   |                   |                        |                     | < 0.001                             |
| Cardiac                             | 108 (44.4%)       | 209 (47.0%)       | 773 (48.7%)            | 321 (62.0%)         |                                     |
| Non-cardiac                         | 135 (55.6%)       | 236 (53.0%)       | 813 (51.3%)            | 197 (38.0%)         |                                     |
| Outcomes                            |                   |                   |                        |                     | < 0.001                             |
| Alive                               | 90 (37.1%)        | 57 (12.8%)        | 83 (5.2%)              | 12 (2.3%)           |                                     |
| Cardiocirculatory death             | 43 (17.7%)        | 100 (22.5%)       | 575 (36.3%)            | 286 (55.2%)         |                                     |
| Neurological death                  | 72 (29.6%)        | 236 (53.0%)       | 750 (47.3%)            | 175 (33.8%)         |                                     |
| Other death                         | 38 (15.6%)        | 52 (11.7%)        | 178 (11.2%)            | 45 (8.7%)           |                                     |

CPR, cardiopulmonary resuscitation; PEA, pulseless electrical activity; CA, cardiac arrest; ECMO, extracorporeal membrane oxygenation; TTM, targeted temperature management

**Table S2.** Multinomial regression after multiple data imputation (n = 2,792), reference population: alive at hospital discharge (full model)

| Reference outcome = alive   | Cardiovascular death |         | Neurological death |         | Other death       |         |
|-----------------------------|----------------------|---------|--------------------|---------|-------------------|---------|
|                             | aOR CI95%            | p-value | aOR CI95%          | p-value | aOR CI95%         | p-value |
| Sex male                    | 0.82 (0.58-1.16)     | 0.26    | 0.73 (0.53-1.02)   | 0.064   | 0.75 (0.51-1.11)  | 0.15    |
| Age (per year)              | 1.04 (1.03-1.05)     | <0.001  | 1.01 (1.00-1.03)   | 0.015   | 1.06 (1.04-1.07)  | <0.001  |
| Home location               | 1.57 (1.11-2.24)     | 0.011   | 1.25 (0.90-1.73)   | 0.19    | 1.96 (1.28-3.00)  | 0.002   |
| Witnessed                   | 1.69 (0.95-3.03)     | 0.076   | 1.51 (0.87-2.62)   | 0.15    | 2.24 (1.14-4.38)  | 0.019   |
| Bystander CPR               | 0.97 (0.60-1.56)     | 0.90    | 0.77 (0.48-1.21)   | 0.25    | 0.99 (0.58-1.68)  | 0.97    |
| No flow duration (per min)  | 1.08 (1.04-1.12)     | <0.001  | 1.08 (1.04-1.11)   | <0.001  | 1.08 (1.04-1.12)  | <0.001  |
| Asystole                    | Reference            |         | Reference          |         | Reference         |         |
| PEA                         | 1.09 (0.72-1.64)     | 0.68    | 0.81 (0.55-1.21)   | 0.30    | 0.70 (0.43-1.16)  | 0.17    |
| Epinephrine during CPR      | Reference            |         | Reference          |         | Reference         |         |
| 0 mg                        | Reference            |         | Reference          |         | Reference         |         |
| 1 mg                        | 3.45 (2.01-5.92)     | <0.001  | 4.40 (2.79-6.94)   | <0.001  | 2.69 (1.49-4.85)  | 0.001   |
| 2-5 mg                      | 12.28 (7.52-20.06)   | <0.001  | 8.88 (5.80-13.59)  | <0.001  | 5.95 (3.49-10.13) | <0.001  |
| >5 mg                       | 23.71 (11.02-50.97)  | <0.001  | 10.26 (4.94-21.31) | <0.001  | 7.45 (3.20-17.33) | <0.001  |
| Low flow duration (per min) | 1.04 (1.03-1.06)     | <0.001  | 1.04 (1.02-1.05)   | <0.001  | 1.04 (1.02-1.05)  | <0.001  |
| Heart disease               | 0.86 (0.58-1.28)     | 0.46    | 1.04 (0.71-1.51)   | 0.84    | 1.08 (0.70-1.67)  | 0.73    |
| Cancer                      | 0.99 (0.59-1.67)     | 0.98    | 1.10 (0.67-1.81)   | 0.69    | 1.74 (1.01-3.01)  | 0.047   |
| Renal disease               | 1.27 (0.68-2.36)     | 0.45    | 1.23 (0.69-2.21)   | 0.49    | 1.44 (0.74-2.80)  | 0.29    |
| High blood pressure         | 0.55 (0.38-0.79)     | 0.001   | 0.76 (0.54-1.08)   | 0.13    | 0.58 (0.38-0.87)  | 0.008   |
| ECMO                        | 0.57 (0.27-1.18)     | 0.13    | 0.35 (0.17-0.73)   | 0.005   | 0.88 (0.37-2.12)  | 0.78    |
| Coronary angioplasty        | 0.51 (0.30-0.86)     | 0.012   | 0.51 (0.31-0.85)   | 0.010   | 0.42 (0.22-0.79)  | 0.008   |
| TTM                         | 0.25 (0.18-0.35)     | <0.001  | 0.83 (0.61-1.14)   | 0.25    | 0.30 (0.20-0.45)  | <0.001  |
| Post resuscitation shock    | 2.13 (1.48-3.05)     | <0.001  | 0.78 (0.56-1.08)   | 0.13    | 0.86 (0.58-1.28)  | 0.46    |
| Presumed cardiac cause      | 2.44 (1.69-3.52)     | <0.001  | 1.06 (0.74-1.50)   | 0.75    | 1.80 (1.20-2.71)  | 0.005   |

CPR, cardiopulmonary resuscitation; PEA, pulseless electrical activity; ECMO, extracorporeal membrane oxygenation; TTM, targeted temperature management

**Table S3.** Multinomial regression without multiple data imputation (n = 2,037), reference population: alive at hospital discharge

| Reference outcome = alive | Cardiovascular death |         | Neurological death |         | Other death       |         |
|---------------------------|----------------------|---------|--------------------|---------|-------------------|---------|
|                           | aOR CI95%            | p-value | aOR CI95%          | p-value | aOR CI95%         | p-value |
| Epinephrine during CPR    |                      |         |                    |         |                   |         |
| 0 mg                      | Reference            |         | Reference          |         | Reference         |         |
| 1 mg                      | 3.30 (1.74-6.26)     | <0.001  | 3.75 (2.20-6.39)   | <0.001  | 2.64 (1.33-5.23)  | 0.005   |
| 2-5 mg                    | 11.99 (6.62-21.68)   | <0.001  | 8.41 (5.08-13.91)  | <0.001  | 5.87 (3.12-11.03) | <0.001  |
| >5 mg                     | 19.06 (7.92-45.87)   | <0.001  | 9.16 (4.02-20.86)  | <0.001  | 5.61 (2.11-14.89) | 0.001   |

Adjustment variables: gender, age, location, witnessed OHCA, bystander CPR, no-flow duration, initial electrical rhythm, low-flow duration, medical history: heart disease, cancer, renal disease, high blood pressure; ECMO use, coronary angioplasty intervention, TTM, post resuscitation shock, presumed cardiac cause.

**Table S4.** Sensitivity analysis (+ years) after multiple data imputation (n = 2,792), reference population: alive at hospital discharge

| Reference outcome = alive | Cardiovascular death |         | Neurological death |         | Other death       |         |
|---------------------------|----------------------|---------|--------------------|---------|-------------------|---------|
|                           | aOR CI95%            | p-value | aOR CI95%          | p-value | aOR CI95%         | p-value |
| Epinephrine during CPR    |                      |         |                    |         |                   |         |
| 0 mg                      | Reference            |         | Reference          |         | Reference         |         |
| 1 mg                      | 3.49 (2.03-5.99)     | <0.001  | 4.50 (2.85-7.10)   | <0.001  | 2.73 (1.51-4.94)  | 0.001   |
| 2-5 mg                    | 12.39 (7.58-20.26)   | <0.001  | 9.02 (5.89-13.82)  | <0.001  | 6.02 (3.53-10.25) | <0.001  |
| >5 mg                     | 23.76 (11.05-51.11)  | <0.001  | 10.19 (4.91-21.17) | <0.001  | 7.41 (3.19-17.25) | <0.001  |
| Years (per year)          | 0.99 (0.94-1.04)     | 0.65    | 0.97 (0.92-1.02)   | 0.18    | 0.97 (0.91-1.04)  | 0.41    |

Adjustment variables: gender, age, location, witnessed OHCA, bystander CPR, no-flow duration, initial electrical rhythm, low-flow duration, medical history: heart disease, cancer, renal disease, high blood pressure; ECMO use, coronary angioplasty intervention, TTM, post resuscitation shock, presumed cardiac cause, years.

**Table S5.** Sensitivity analysis (+ years) without multiple data imputation (n = 2,037), reference population: alive at hospital discharge

| Reference outcome = alive | Cardiovascular death |         | Neurological death |         | Other death       |         |
|---------------------------|----------------------|---------|--------------------|---------|-------------------|---------|
|                           | aOR CI95%            | p-value | aOR CI95%          | p-value | aOR CI95%         | p-value |
| Epinephrine during CPR    |                      |         |                    |         |                   |         |
| 0 mg                      | Reference            |         | Reference          |         | Reference         |         |
| 1 mg                      | 3.34 (1.76-6.35)     | <0.001  | 3.81 (2.24-6.50)   | <0.001  | 2.68 (1.35-5.31)  | 0.005   |
| 2-5 mg                    | 12.08 (6.67-21.86)   | <0.001  | 8.48 (5.12-14.04)  | <0.001  | 5.90 (3.14-11.10) | <0.001  |
| >5 mg                     | 19.11 (7.93-46.06)   | <0.001  | 9.06 (3.98-20.65)  | <0.001  | 5.55 (2.09-14.76) | 0.001   |
| Years (per year)          | 0.99 (0.93-1.06)     | 0.75    | 0.97 (0.91-1.03)   | 0.34    | 0.98 (0.91-1.05)  | 0.51    |

Adjustment variables: gender, age, location, witnessed OHCA, bystander CPR, no-flow duration, initial electrical rhythm, low-flow duration, medical history: heart disease, cancer, renal disease, high blood pressure; ECMO use, coronary angioplasty intervention, TTM, post resuscitation shock, presumed cardiac cause, years.

**Table S6.** Sensitivity analysis, epinephrine as continuous variable, reference population: alive at hospital discharge

| Reference outcome = alive      | Cardiocirculatory death |         | Neurological death |         | Other death      |         |
|--------------------------------|-------------------------|---------|--------------------|---------|------------------|---------|
|                                | aOR CI95%               | p-value | aOR CI95%          | p-value | aOR CI95%        | p-value |
| Epinephrine during CPR, per mg | 1.46 (1.33-1.61)        | <0.001  | 1.33 (1.21-1.46)   | <0.001  | 1.41 (1.27-1.57) | 0.001   |

Adjustment variables: gender, age, location, witnessed OHCA, bystander CPR, no-flow duration, initial electrical rhythm, low-flow duration, medical history: heart disease, cancer, renal disease, high blood pressure; ECMO use, coronary angioplasty intervention, TTM, post resuscitation shock, presumed cardiac cause, years.

**Table S7.** Sensitivity analysis according to low-flow duration (tertiles), reference population: alive at hospital discharge

|                                                       | Cardiovascular death |         | Neurological death  |         | Other death         |         |
|-------------------------------------------------------|----------------------|---------|---------------------|---------|---------------------|---------|
|                                                       | aOR 95%CI            | p-value | aOR 95%CI           | p-value | aOR 95%CI           | p-value |
| <b>Low-flow duration ≤ 19 min (n = 868)</b>           |                      |         |                     |         |                     |         |
| Epinephrine during CPR                                | Reference            |         | Reference           |         | Reference           |         |
| 0 mg                                                  | 2.53 (1.27-5.06)     | 0.009   | 4.08 (2.34-7.12)    | <0.001  | 2.14 (0.99-4.63)    | 0.053   |
| 1 mg                                                  | 12.96 (6.96-24.15)   | <0.001  | 8.26 (4.82-14.15)   | <0.001  | 5.13 (2.56-10.26)   | <0.001  |
| 2-5 mg                                                | 12.06 (3.76-38.69)   | <0.001  | 5.42 (1.73-16.93)   | 0.004   | 5.64 (1.41-22.64)   | 0.015   |
| > 5 mg                                                |                      |         |                     |         |                     |         |
| <b>Low-flow duration 20 min to 30 min (n = 1,023)</b> |                      |         |                     |         |                     |         |
| Epinephrine during CPR                                | Reference            |         | Reference           |         | Reference           |         |
| 0 mg                                                  | 4.13 (1.46-11.71)    | 0.008   | 4.48 (1.81-11.08)   | 0.001   | 4.23 (1.36-13.11)   | 0.013   |
| 1 mg                                                  | 12.06 (4.67-31.13)   | <0.001  | 8.58 (3.78-19.47)   | <0.001  | 6.53 (2.34-18.23)   | <0.001  |
| 2-5 mg                                                | 44.58 (8.33-238.62)  | <0.001  | 22.36 (4.48-111.50) | <0.001  | 14.89 (2.44-90.85)  | 0.003   |
| > 5 mg                                                |                      |         |                     |         |                     |         |
| <b>Low-flow duration &gt; 30 min (n = 901)</b>        |                      |         |                     |         |                     |         |
| Epinephrine during CPR                                | Reference            |         | Reference           |         | Reference           |         |
| 0 mg                                                  | 4.63 (0.40-53.30)    | 0.219   | 4.99 (0.44-56.65)   | 0.195   | 3.83 (0.18-81.17)   | 0.388   |
| 1 mg                                                  | 12.86 (1.52-108.85)  | 0.019   | 7.76 (0.91-66.41)   | 0.062   | 9.74 (0.63-149.99)  | 0.103   |
| 2-5 mg                                                | 52.76 (5.81-479.46)  | <0.001  | 17.67 (1.92-162.62) | 0.011   | 21.87 (1.33-358.93) | 0.031   |
| > 5 mg                                                |                      |         |                     |         |                     |         |

Adjustment variables: gender, age, location, witnessed OHCA, bystander CPR, no-flow duration, initial electrical rhythm, low-flow duration, medical history: heart disease, cancer, renal disease, high blood pressure; ECMO use, coronary angioplasty intervention, TTM, post resuscitation shock, presumed cardiac cause.

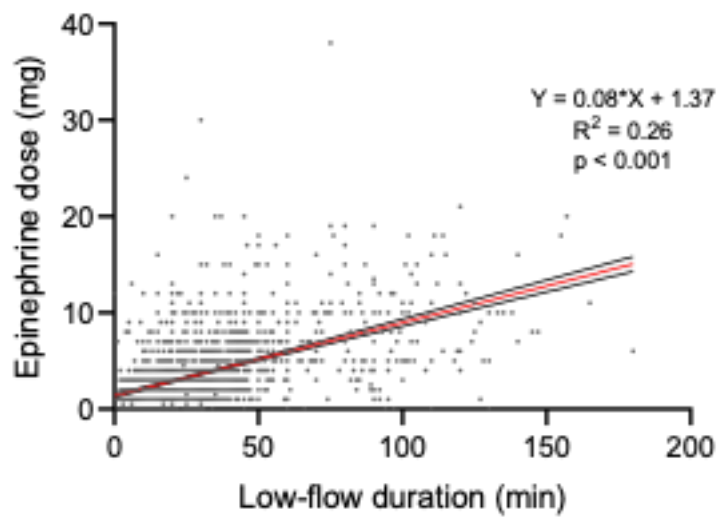

**Figure S1.** Linear regression of the low-flow duration (minutes) in relation to epinephrine dose used during CPR (mg).

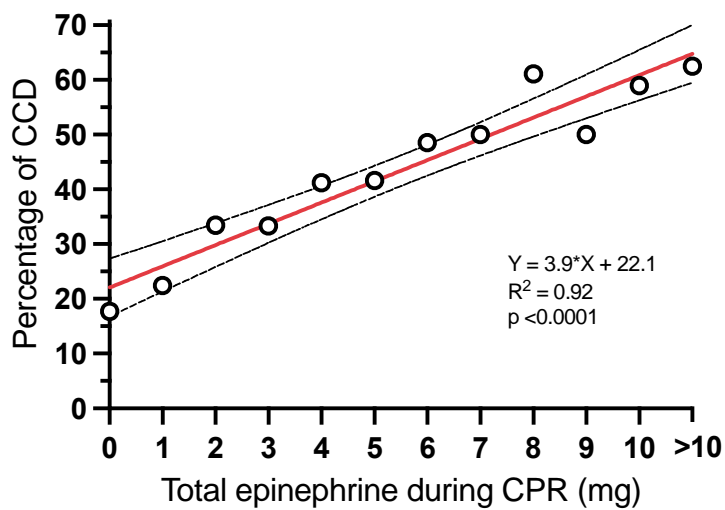

**Figure S2.** Linear regression of the proportion of deaths from cardiovascular causes (CCD, cardiovascular death) in relation to epinephrine dose used during CPR.



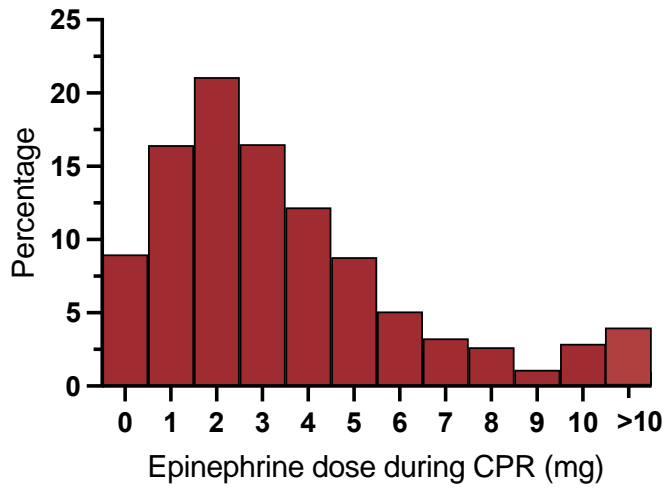

**Figure S3.** Total epinephrine dose used during CPR in the complete population of the study.

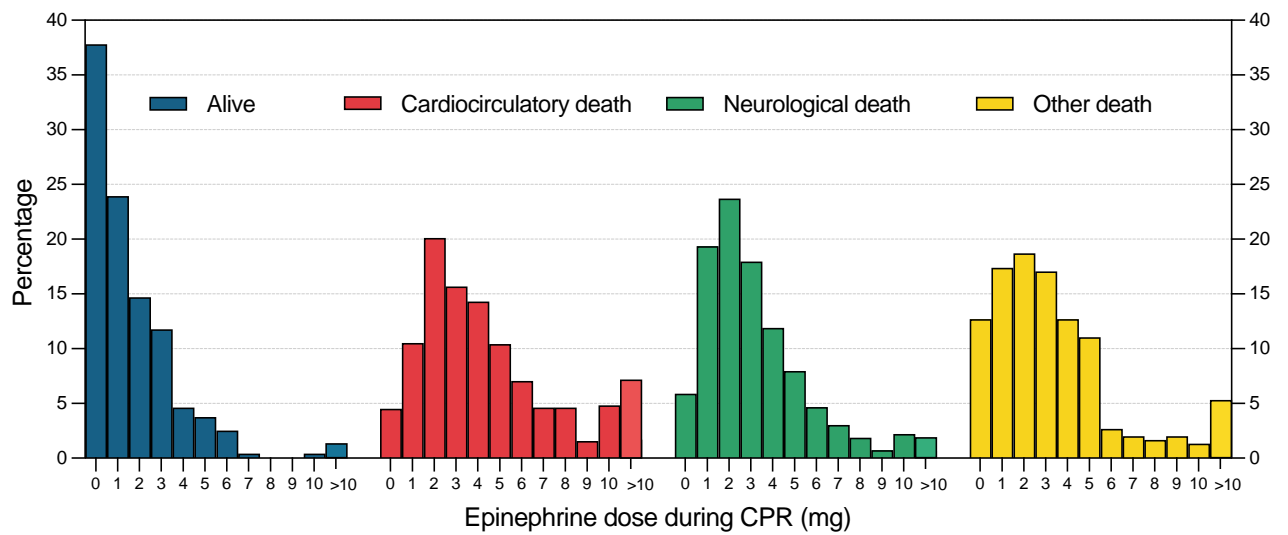

**Figure S4.** Percentage proportion of epinephrine use during CPR by outcome.

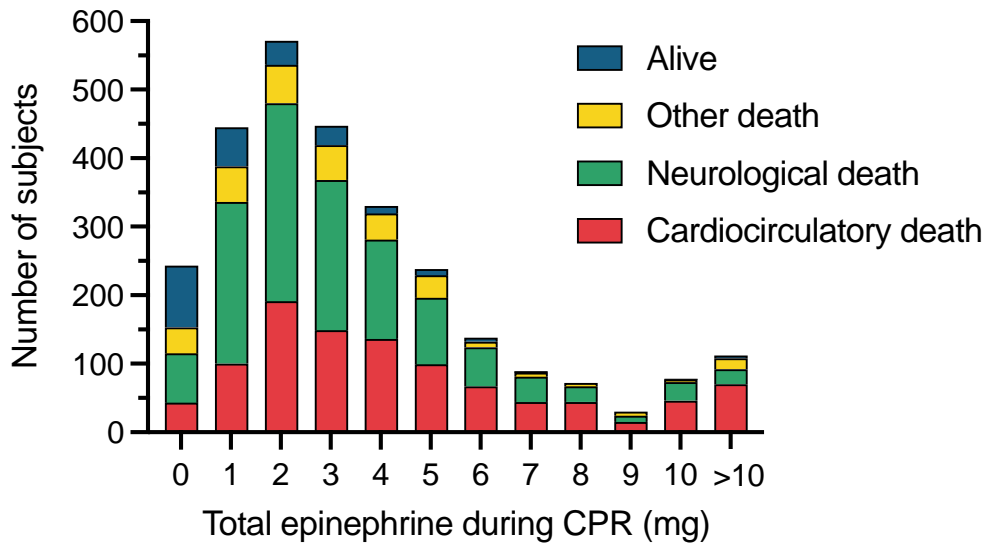

**Figure S5.** Number of subjects by epinephrine dose used during CPR and outcome.
